# Supplementary material for: Post-COVID-19 Cognitive Decline and Apoe Polymorphism: Towards a Possible Link?
Source: MDPI journal article supplement (doi:10.3390/brainsci13121611), 2023-11-21
Supplement: s1 [file s1]

## ***SUPPLEMENTAL MATERIAL***

### ***Cognitive assessment***

Participants underwent application of Addenbrooke's Cognitive Examination-Revised (ACE-R), Mini-Mental State Examination (MMSE), and Clinical Dementia Rating (CDR). Pfeffer instrumental activities of daily living scale was applied to assess functionality and the Geriatric Depression Scale (GDS) to assess mood, or the Beck Inventory, depending on patient age.<sup>49-54</sup> Furthermore, the PRMQ scale was applied for retrospective memory assessment.<sup>55</sup> The values of 58, 76, and 83 were used as the cutoff point for the ACE-R respectively for <4, 4-8, and > 8 years of schooling.<sup>56,57</sup> For the MMSE, the cutoff points of 19 and 24, respectively for 0 and up to 4 years of schooling, were used.<sup>58,59</sup> Functional impairment was defined from a score of 3 on the Pfeffer scale.<sup>60</sup> Regarding psychiatric evaluation, we used a cutoff point of 3 on the GDS and ten on the Beck inventory for a depression diagnosis.<sup>54,61</sup> Cognitive impairment was defined, in this study, when there was a cognitive complaint confirmed proven by screening tests, regardless of functional impairment. Patients with cognitive complaints without objective impairment in the tests performed were characterized as subjective cognitive decline.<sup>13</sup>

### ***2.3 APOE genotyping analysis***

According to the manufacturer's instructions, the patient's blood samples were collected in EDTA tubes, and subsequently, genomic DNA was extracted from peripheral blood leukocytes with the commercial PureLink™ Genomic DNA Mini Kit® (Invitrogen).<sup>62</sup> ApoE genotypes were determined by real-time Polymerase Chain Reaction (qPCR) using the TaqMan® allelic discrimination system (TaqMan® SNP Genotyping Assay, ThermoFisher®).<sup>14</sup> For this, we used probes according to the sequences provided by the manufacturer: C\_\_\_3084793\_20 (rs429358) and C\_\_\_904973\_10 (rs7412), observing the information contained in the catalog number:

4351379 and similar protocols described in the literature for performing the technique. All analysis was performed in the QuantStudio® 5 real-time PCR platform (Applied Biosystems®, Foster City, CA, USA).<sup>62</sup>

## Ethical Aspects

The Research Ethics Committee of the Walter Cantídio University Hospital approved the study project under the number 4.092.933. All patients signed an Informed Consent Form, with the right to privacy and confidentiality of the information obtained, and could refuse to participate in the proposed activities and questions.

**Table S1.** Sociodemographic, clinical characteristics and post-Covid symptoms in groups without and with cognitive impairment (CI).

|                            | No<br>Cognitive<br>impairment<br>(n=183) | CI (n=36)   | p*     |
|----------------------------|------------------------------------------|-------------|--------|
| <b>Gender</b>              |                                          |             | 0.371  |
| Female                     | 121 (66.1)                               | 21 (58.3)   |        |
| Male                       | 62 (33.9)                                | 15 (41.7)   |        |
| <b>Age (years)</b>         | 44.4 ± 13.4                              | 56.3 ± 16.1 |        |
| <b>Age range</b>           |                                          |             | <0.001 |
| < 50 years                 | 117 (63.9)                               | 13 (36.1)   |        |
| 50 - 65 years              | 54 (29.5)                                | 13 (36.1)   |        |
| > 65 years                 | 12 (6.6)                                 | 10 (27.8)   |        |
| <b>Scholarity in Years</b> |                                          |             | 0.012  |
| 0 - 4 years                | 11 (6)                                   | 5 (13.9)    |        |
| 5 - 8 years                | 18 (9.8)                                 | 9 (25)      |        |

|                                            |            |           |        |
|--------------------------------------------|------------|-----------|--------|
| > 8 years                                  | 154 (84.2) | 22 (61.1) |        |
| <b>Hospitalization</b>                     |            |           | <0.001 |
| No                                         | 148 (80.9) | 16 (44.4) |        |
| Yes                                        | 35 (19.1)  | 20 (55.6) |        |
| <b>Clinical data – post-COVID symptoms</b> |            |           |        |
| <b>Anosmia</b>                             |            |           | 0.002  |
| No                                         | 121 (66.1) | 33 (91.7) |        |
| Yes                                        | 62 (33.9)  | 3 (8.3)   |        |
| <b>Sleep disorders</b>                     |            |           | 0.848  |
| No                                         | 130 (71)   | 25 (69.4) |        |
| Yes                                        | 53 (29)    | 11 (30.6) |        |
| <b>Depression</b>                          |            |           | 0.548  |
| No                                         | 150 (82)   | 31 (86.1) |        |
| Yes                                        | 33 (18)    | 5 (13.9)  |        |
| <b>Anxiety symptoms</b>                    |            |           | 0.878  |
| No                                         | 135 (73.8) | 27 (75)   |        |
| Yes                                        | 48 (26.2)  | 9 (25)    |        |
| <b>Headache</b>                            |            |           | 0.598  |
| No                                         | 124 (67.8) | 26 (72.2) |        |
| Yes                                        | 59 (32.2)  | 10 (27.8) |        |

Continuous data expressed as mean  $\pm$  standard deviation. Categorical data expressed as absolute counts and percentages in parentheses. \*Chi-square test was used for categorical data and Student's t test for age. CI: Cognitive impairment. Source: Authors elaboration, 2023.

**Table S2.** Test scores applied in the total group.

| Applied test scores        | Total group (n=219) |
|----------------------------|---------------------|
| Median PFEFFER (min – max) | 0 (0 - 30)          |
| Beck Inventory (IQR)       | 0 (0 - 11)          |

|                                          |             |
|------------------------------------------|-------------|
| <b>GDS (IQR)</b>                         | 3 (0 - 5)   |
| <b>CDR, median (min – max)</b>           | 0 (0 - 3)   |
| <b>PRMQ, mean ± SD</b>                   | 7 ± 4       |
| <b>MMSE, mean ± SD</b>                   | 26.6 ± 6.1  |
| <b>ACE-R, mean ± SD</b>                  | 80.2 ± 20.6 |
| <b>Orientation/Attention, mean ± SD</b>  | 16.1 ± 3.8  |
| <b>Memory, mean ± SD</b>                 | 18.7 ± 6.1  |
| <b>Verbal Fluency, average ± SD</b>      | 9.5 ± 3.4   |
| <b>Language, mean ± SD</b>               | 22.8 ± 5.9  |
| <b>Visual-spatial ability, mean ± SD</b> | 13.2 ± 4    |

IQR: interquartile range. SD: standard deviation. GDS: Geriatric Depression Scale; CDR: Clinical Dementia Rating; PRMQ: Prospective and Retrospective Memory Questionnaire's; MMSE: Mini-Mental State Examination; ACE-R: Addenbrooke's Cognitive Examination – Revised. Source: Authors elaboration, 2023.

**Table S3.** Comparison of test scores applied in relation to cognitive status.

|                                          | <b>Normal<br/>(n=76)</b> | <b>Dementia<br/>(n=11)</b> | <b>SCD (n=107)</b> | <b>MCI (n=25)</b> | <b>p*</b>             |
|------------------------------------------|--------------------------|----------------------------|--------------------|-------------------|-----------------------|
| <b>Median PFEFFER (min – max)</b>        | 0 (0 - 7)                | 29 (0 - 30)                | 0 (0 - 26)         | 0 (0 - 3)         | <0.001 <sup>A</sup>   |
| <b>Beck Inventory (IQR)</b>              | 0 (0 - 6)                | 0 (0 - 0)                  | 2 (0 - 12)         | 0 (0 - 13)        | 0.067                 |
| <b>GDS (IQR)</b>                         | 3.5 (1 – 5.5)            | 2 (1 - 5)                  | 3 (0 - 5)          | 4,5(1.5 – 8.5)    | 0.807                 |
| <b>CDR, median (min – max)</b>           | 0 (0 - 0)                | 3 (0 - 3)                  | 0 (0 - 0)          | 0 (0 - 1)         | <0.001 <sup>A</sup>   |
| <b>PRMQ, mean ± SD</b>                   | 6 ± 3                    | 13 ± 8                     | 7 ± 3              | 7 ± 4             | <0.001 <sup>A</sup>   |
| <b>MMSE, mean ± SD</b>                   | 26.8 ± 6.6               | 15.2 ± 6.7                 | 27.7 ± 4.9         | 26.2 ± 2.4        | <0.001 <sup>A</sup>   |
| <b>ACE-R, mean ± SD</b>                  | 81.6 ± 21.5              | 36.7 ± 20.1                | 85.8 ± 16          | 71.5 ± 6          | <0.001 <sup>A,B</sup> |
| <b>Orientation/Attention, mean ± SD</b>  | 16.2 ± 4.1               | 8.6 ± 4.5                  | 16.8 ± 3.1         | 16.2 ± 2          | <0.001 <sup>A</sup>   |
| <b>Memory, mean ± SD</b>                 | 19.6 ± 6.3               | 9.2 ± 7.3                  | 20.1 ± 4.7         | 14.1 ± 3.9        | <0.001 <sup>C,D</sup> |
| <b>Verbal Fluency, average ± SD</b>      | 9.7 ± 3.3                | 3.2 ± 3                    | 10.4 ± 2.9         | 7.8 ± 2.5         | <0.001 <sup>A,D</sup> |
| <b>Language, mean ± SD</b>               | 22.9 ± 6.1               | 10.8 ± 8.6                 | 24.1 ± 4.5         | 22.2 ± 2.5        | <0.001 <sup>A</sup>   |
| <b>Visual-spatial ability, mean ± SD</b> | 13.4 ± 4.2               | 4.9 ± 3.6                  | 14.1 ± 3.1         | 12.4 ± 2.2        | <0.001 <sup>A</sup>   |

IQR: interquartile range. SD: standard deviation. DCS: Subjective cognitive decline; MCI: Mild Cognitive Impairment.

\*We used the ANOVA test with Tukey's post-test for means and the Kruskal-Wallis test with multiple comparisons for medians. A:  $p < 0.05$  between: "Dementia" vs other groups. B: CCL vs DCS. C: "Dementia" vs DCL and normal. D: CCL vs DCS and normal. GDS: Geriatric Depression Scale; CDR: Clinical Dementia Rating; PRMQ: Prospective and Retrospective Memory Questionnaire's; MMSE: Mini-Mental State Examination; ACE-R: Addenbrooke's Cognitive Examination – Revised. Source: Authors elaboration, 2023.

**Table S4.** Comparison of test scores applied between normal patients and patients with cognitive decline.

|                                                         | Normal (n=76)   | CD (n=143)      | p     |
|---------------------------------------------------------|-----------------|-----------------|-------|
| <b>Median PFEFFER (min – max)</b>                       | 0 (0 - 7)       | 0 (0 - 30)      | 0.144 |
| <b>Beck Inventory (IQR)</b>                             | 0 (0 - 6)       | 2 (0 - 12)      | 0.048 |
| <b>GDS (IQR)</b>                                        | 3.5 (1 - 5,5)   | 3 (0 - 5)       | 0.790 |
| <b>CDR, median (min – max)</b>                          | 0 (0 - 0)       | 0 (0 - 3)       | 0.013 |
| <b>PRMQ, mean <math>\pm</math> SD</b>                   | 6 $\pm$ 3       | 7 $\pm$ 4       | 0.084 |
| <b>MMSE, mean <math>\pm</math> SD</b>                   | 26.8 $\pm$ 6.6  | 26.5 $\pm$ 5.8  | 0.69  |
| <b>ACE-R, mean <math>\pm</math> SD</b>                  | 81.6 $\pm$ 21.5 | 79.5 $\pm$ 20.2 | 0.465 |
| <b>Orientation/Attention, mean <math>\pm</math> SD</b>  | 16.2 $\pm$ 4.1  | 16.1 $\pm$ 3.7  | 0.855 |
| <b>Memory, mean <math>\pm</math> SD</b>                 | 19.6 $\pm$ 6.3  | 18.2 $\pm$ 5.9  | 0.106 |
| <b>Verbal Fluency, average <math>\pm</math> SD</b>      | 9.7 $\pm$ 3.3   | 9.4 $\pm$ 3.5   | 0.593 |
| <b>Language, mean <math>\pm</math> SD</b>               | 22.9 $\pm$ 6.1  | 22.8 $\pm$ 5.8  | 0.868 |
| <b>Visual-spatial ability, mean <math>\pm</math> SD</b> | 13.4 $\pm$ 4.2  | 13.1 $\pm$ 3.9  | 0.626 |

\*Student's t test was used to compare means, and the Mann-Whitney test to compare medians. IQR: interquartile range. SD: standard deviation. DC: Cognitive Decline. GDS: Geriatric Depression Scale; CDR: Clinical Dementia Rating; PRMQ: Prospective and Retrospective Memory Questionnaire's; MMSE: Mini-Mental State Examination; ACE-R: Addenbrooke's Cognitive Examination – Revised. Source: Authors elaboration, 2023.

**Table S5.** Comparison of test scores applied between patients with and without cognitive impairment.

|  | No cognitive<br>impairment (n=183) | CI (n=36) | p* |
|--|------------------------------------|-----------|----|
|--|------------------------------------|-----------|----|

|                                          |             |             |        |
|------------------------------------------|-------------|-------------|--------|
| <b>Median PFEFFER (min – max)</b>        | 0 (0 - 26)  | 0 (0 - 30)  | <0.001 |
| <b>Beck Inventory (IQR)</b>              | 0 (0 - 11)  | 0 (0 - 12)  | 0.785  |
| <b>GDS (IQR)</b>                         | 3 (0 - 5)   | 3 (1 - 6)   | 0.69   |
| <b>CDR, median (min – max)</b>           | 0 (0 - 0)   | 0 (0 - 3)   | <0.001 |
| <b>PRMQ, mean ± SD</b>                   | 6 ± 3       | 9 ± 6       | 0.033  |
| <b>MMSE, mean ± SD</b>                   | 27.4 ± 5.7  | 22.9 ± 6.6  | <0.001 |
| <b>ACE-R, mean ± SD</b>                  | 84.1 ± 18.5 | 60.9 ± 20.1 | <0.001 |
| <b>Orientation/Attention, mean ± SD</b>  | 16.6 ± 3.5  | 13.9 ± 4.6  | <0.001 |
| <b>Memory, mean ± SD</b>                 | 19.9 ± 5.4  | 12.6 ± 5.6  | <0.001 |
| <b>Verbal Fluency, average ± SD</b>      | 10.1 ± 3.1  | 6.4 ± 3.4   | <0.001 |
| <b>Language, mean ± SD</b>               | 23.6 ± 5.2  | 18.7 ± 7.3  | <0.001 |
| <b>Visual-spatial ability, mean ± SD</b> | 13.8 ± 3.6  | 10.1 ± 4.4  | <0.001 |

\*Student's t test was used to compare means, and the Mann-Whitney test to compare medians. IQR: interquartile range. SD: standard deviation. CC: Cognitive impairment. GDS: Geriatric Depression Scale; CDR: Clinical Dementia Rating; PRMQ: Prospective and Retrospective Memory Questionnaire's; MMSE: Mini-Mental State Examination; ACE-R: Addenbrooke's Cognitive Examination – Revised. Source: Authors elaboration, 2023.

**Table S6.** Comparison of APOE genotypes and their alleles in relation to cognitive status.

|             | <b>Normal (n=76)</b> | <b>Dementia (n=11)</b> | <b>SCD (n=107)</b> | <b>MCI (n=25)</b> | <b>p</b> |
|-------------|----------------------|------------------------|--------------------|-------------------|----------|
| <b>APOE</b> |                      |                        |                    |                   | 0.923    |
| E2/E2       | 0 (0)                | 0 (0)                  | 1 (1,1)            | 0 (0)             |          |
| E2/E3       | 5 (8.2)              | 1 (9.1)                | 6 (6.7)            | 2 (8.7)           |          |
| E2/E4       | 0 (0)                | 0 (0)                  | 1 (1,1)            | 0 (0)             |          |
| E3/E3       | 46 (75.4)            | 6 (54.5)               | 55 (61.1)          | 15 (65.2)         |          |
| E3/E4       | 9 (14.8)             | 4 (36.4)               | 25 (27.8)          | 5 (21.7)          |          |
| E4/E4       | 1 (1.6)              | 0 (0)                  | 2 (2.2)            | 1 (4.3)           |          |

#### Alleles

|           |           |           |           |           |       |
|-----------|-----------|-----------|-----------|-----------|-------|
| <b>E2</b> |           |           |           |           | 0.999 |
| No        | 56 (91.8) | 10 (90.9) | 82 (91.1) | 21 (91.3) |       |
| Yes       | 5 (8.2)   | 1 (9.1)   | 8 (8.9)   | 2 (8.7)   |       |
| <b>E3</b> |           |           |           |           | 0.618 |
| No        | 1 (1.6)   | 0 (0)     | 4 (4.4)   | 1 (4.3)   |       |
| Yes       | 60 (98.4) | 11 (100)  | 86 (95.6) | 22 (95.7) |       |
| <b>E4</b> |           |           |           |           | 0.190 |
| No        | 51 (83.6) | 7 (63.6)  | 62 (68.9) | 17 (73.9) |       |
| Yes       | 10 (16,4) | 4 (36,4)  | 28 (31,1) | 6 (26,1)  |       |

Categorical data expressed as absolute counts and percentages in parentheses. The chi-square or Fisher's exact test was used. SCD: Subjective cognitive decline; MCI: Mild Cognitive Impairment; APOE: Apolipoprotein E. Source: Authors elaboration, 2023.

**Table S7.** Comparison of APOE genotypes and alleles between groups with and without cognitive impairment.

|                | No cognitive<br>impairment (n=151) | CI (n=34) | p     |
|----------------|------------------------------------|-----------|-------|
| <b>APOE</b>    |                                    |           | 0.966 |
| E2/E2          | 1 (0.7)                            | 0 (0)     |       |
| E2/E3          | 11 (7.3)                           | 3 (8.8)   |       |
| E2/E4          | 1 (0.7)                            | 0 (0)     |       |
| E3/E3          | 101 (66.9)                         | 21 (61.8) |       |
| E3/E4          | 34 (22.5)                          | 9 (26.5)  |       |
| E4/E4          | 3 (2)                              | 1 (2.9)   |       |
| <b>Alleles</b> |                                    |           |       |
| <b>E2</b>      |                                    |           | 0.968 |
| No             | 138 (91.4)                         | 31 (91.2) |       |

|           |     |            |           |       |
|-----------|-----|------------|-----------|-------|
|           | Yes | 13 (8.6)   | 3 (8.8)   |       |
| <b>E3</b> |     |            |           | 1.000 |
|           | No  | 5 (3.3)    | 1 (2.9)   |       |
|           | Yes | 146 (96.7) | 33 (97.1) |       |
| <b>E4</b> |     |            |           | 0.610 |
|           | No  | 113 (74.8) | 24 (70.6) |       |
|           | Yes | 38 (25.2)  | 10 (29.4) |       |

---

Categorical data expressed as absolute counts and percentages in parentheses. The chi-square or Fisher's exact test was used. CI: Cognitive impairment; APOE: Apolipoprotein E. Source: Authors elaboration, 2023.
